# Supplementary material
Source: Springer Nature journal article supplement (https://www.springermedizin.de/resource/supplementary/12943_2012_1125_MOESM15_ESM.docx/9552524)

**Table 2.**

**Leukemia models: *Comparison of response rates and AKT expression levels***


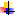


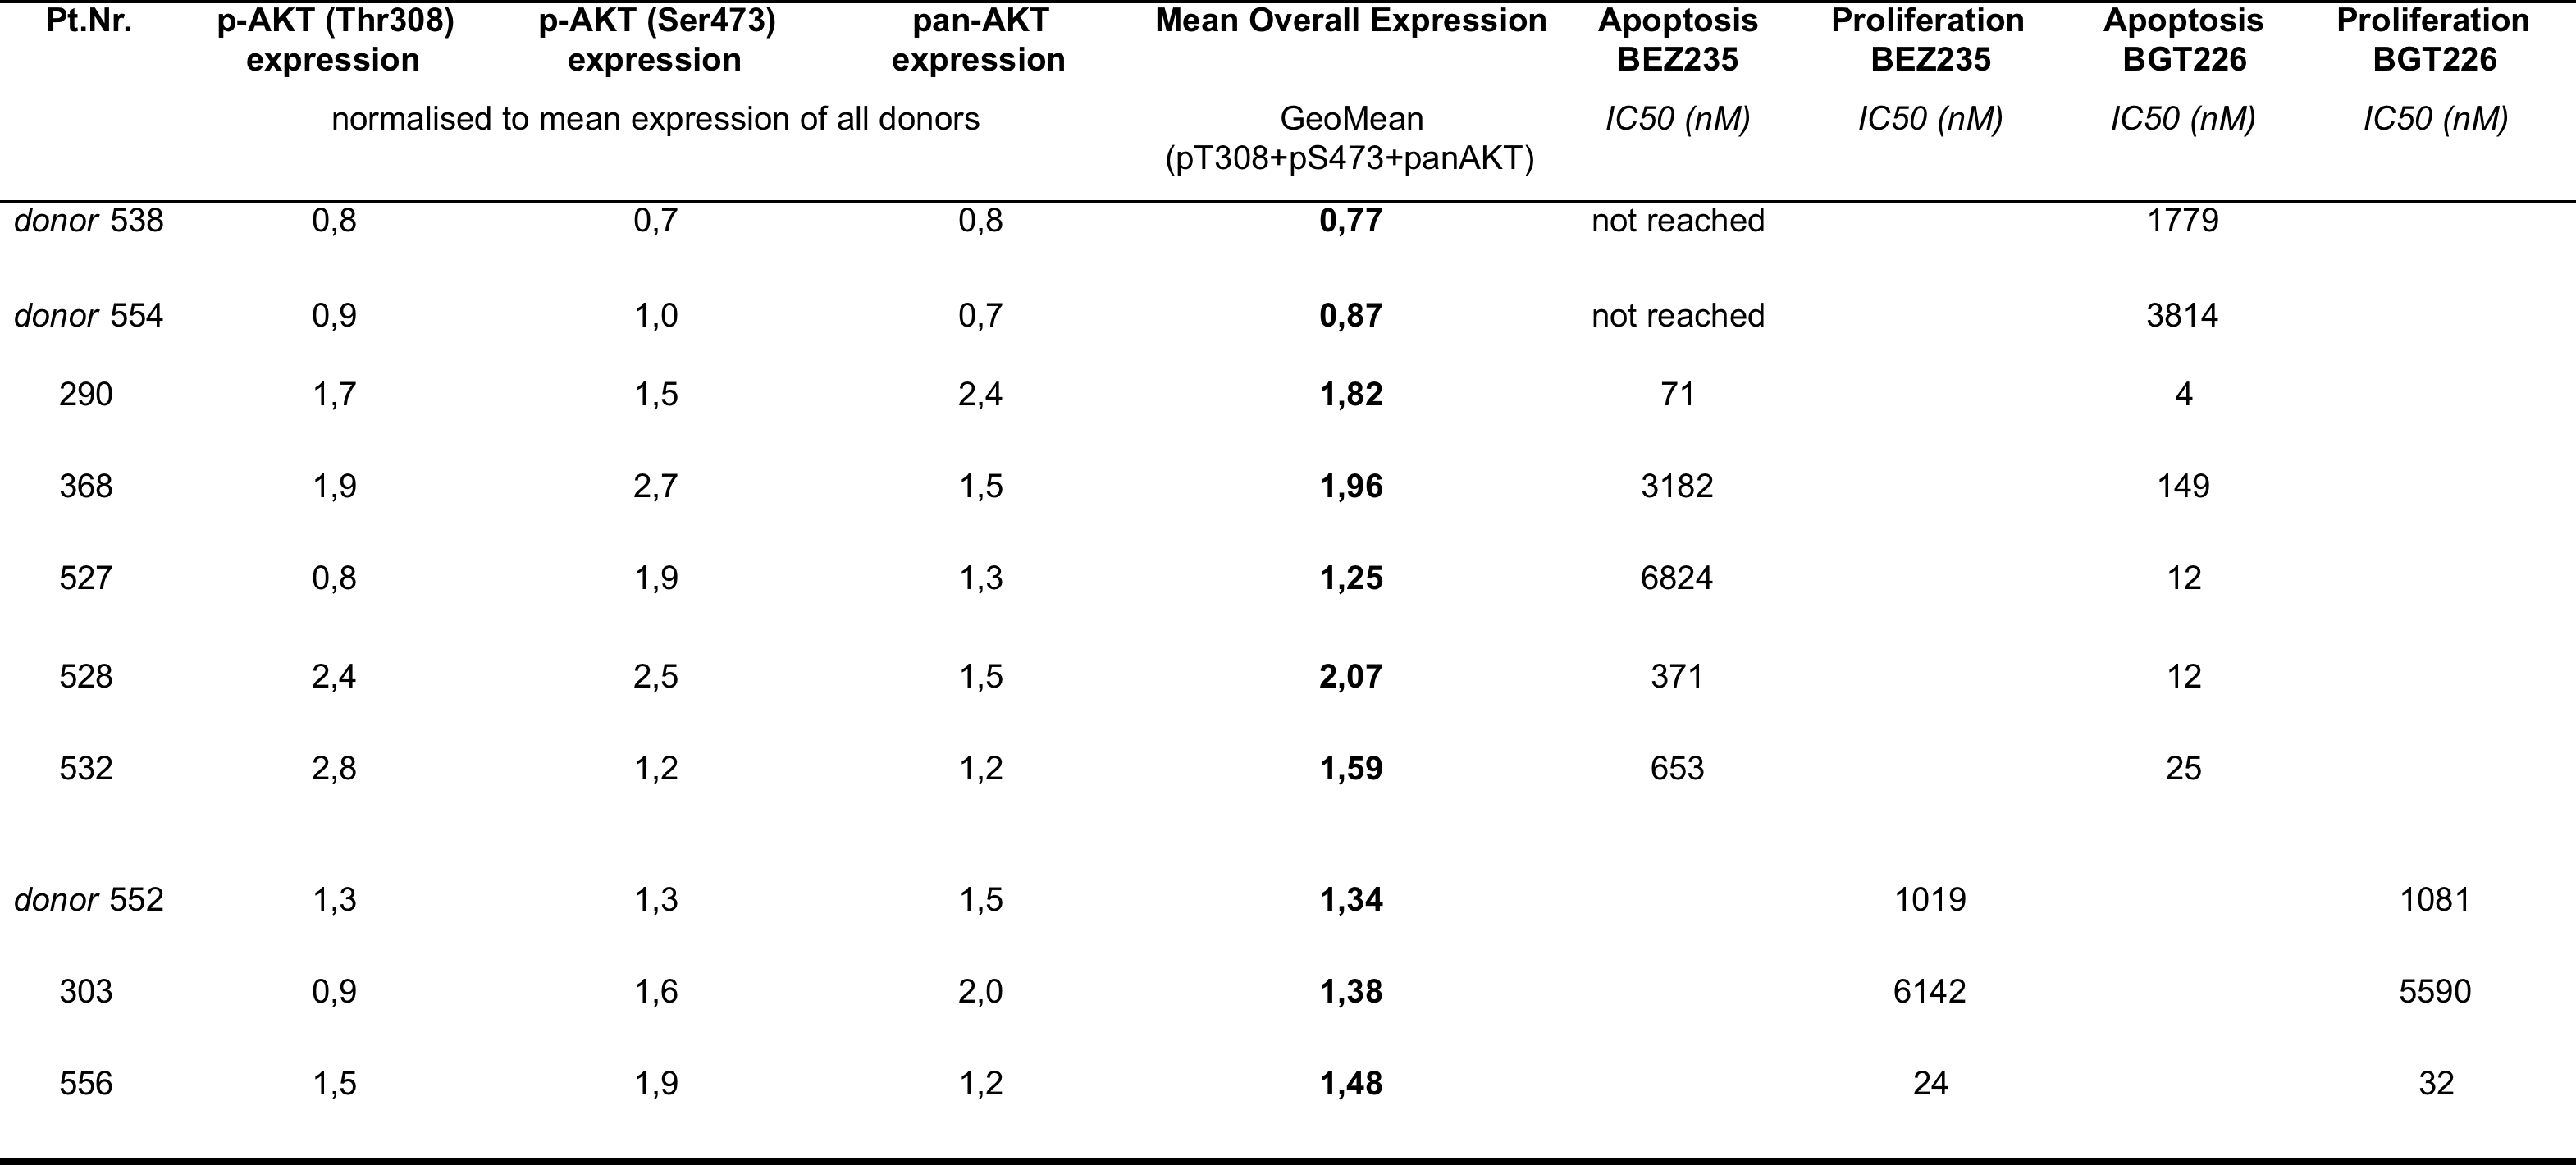

Supplement: MOESM15 [file 9552524]
